# Supplementary material for: Hydrothermally synthesized 2H-WS 2 nanorods for improved supercapacitor electrode performance
Source: Royal Society of Chemistry journal article supplement (doi:10.1039/d5cp00756a), 2025-01-01
Supplement: d5cp00756a1.pdf [file d5cp00756a1.pdf]

## ARTICLE

# Hydrothermal Synthesized 2H-WS<sub>2</sub> Nanorods for Improved Supercapacitor Electrode Performance

Received 00th January 20xx,  
Accepted 00th January 20xx

Somveer,<sup>a</sup> Rohit Yadav,<sup>b</sup> Jitesh Pani,<sup>b</sup> Rakesh Nanna,<sup>b</sup> Ranjit Kumar,<sup>c,d</sup> Vinay S. Palaparthi,<sup>e</sup> Kusum Kumari,<sup>b</sup> Davender Singh,<sup>f</sup> Dharamvir Singh Ahlawat,<sup>\*a</sup> Hitesh Borkar<sup>\*b</sup> and Jitendra Gangwar<sup>\*f</sup>

DOI: 10.1039/x0xx00000x

Table S1 provides the calculated distinctive electronic properties including dipole moment,  $E_{\text{HOMO}}$ ,  $E_{\text{LUMO}}$ , electron affinity, ionization potential, chemical potential, electronegativity, chemical hardness, charge transfer and nucleophilic index for WS<sub>2</sub> structure and WS<sub>2</sub> attached with K<sup>+</sup>.

**Table S1** Calculated electronic properties of WS<sub>2</sub> and WS<sub>2</sub> with K<sup>+</sup>.

| Electronic Properties                                                    | WS <sub>2</sub>            | WS <sub>2</sub> with K     |
|--------------------------------------------------------------------------|----------------------------|----------------------------|
| Dipole moment                                                            | $4.269 \times 10^{-32}$ Cm | $2.129 \times 10^{-29}$ Cm |
| $E_{\text{HOMO}}$                                                        | - 5.731 eV                 | - 3.117 eV                 |
| $E_{\text{LUMO}}$                                                        | - 4.578 eV                 | - 2.449 eV                 |
| $E_{\text{LUMO}} - E_{\text{HOMO}}$ ( $\Delta E$ )                       | 1.153 eV                   | 0.668 eV                   |
| Electron affinity (EA) = $-E_{\text{LUMO}}$                              | 4.578 eV                   | 2.449 eV                   |
| Ionisation potential (IP) = $-E_{\text{HOMO}}$                           | 5.731 eV                   | 3.117 eV                   |
| Chemical potential ( $\chi$ ) = $-(E_{\text{LUMO}} + E_{\text{HOMO}})/2$ | - 5.155 eV                 | -2.783 eV                  |
| Electronegativity ( $\mu$ ) = $-(E_{\text{LUMO}} + E_{\text{HOMO}})/2$   | 5.155 eV                   | 2.783 eV                   |
| Chemical hardness ( $\eta$ ) = $(E_{\text{LUMO}} - E_{\text{HOMO}})/2$   | 0.577 eV                   | 0.334 eV                   |
| Charge transfer ( $\Delta N_{\text{max}}$ ) = $-(\mu/\eta)$              | - 8.934                    | - 8.332                    |
| Nucleophilic index ( $\omega$ ) = $-(\mu^2/2\eta)$                       | - 23.027                   | - 11.593                   |

Fig. S1 demonstrates the comparative CV curves for different electrolytes at scan rate of 100 mV/s.

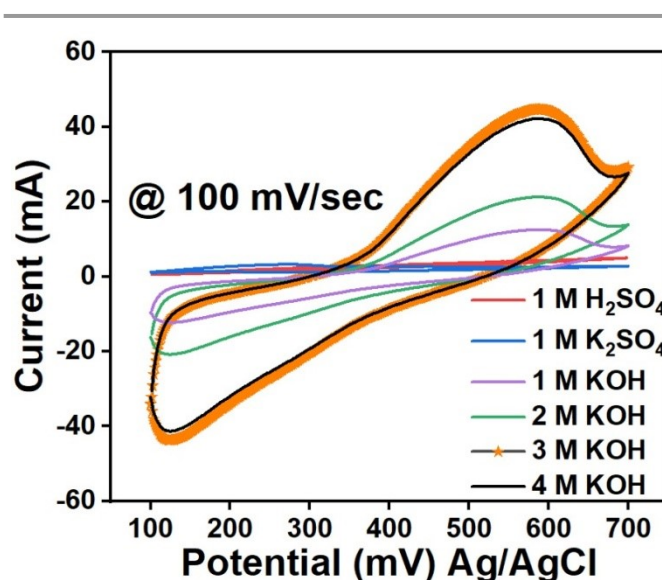

**Fig. S1** Comparative CV curves stating at different electrolyte at 100 mV/Sec scan rate.

<sup>a</sup> Department of Physics, Chaudhary Devi Lal University, Sirsa, Haryana 125055, India.

<sup>b</sup> Department of Physics, National Institute of Technology, Warangal, Telangana, 506004, India.

<sup>c</sup> Department of Physics, Arignar Anna Government Arts and Science College, Karaikal, UT of Puducherry 609605, India.

<sup>d</sup> Department of Physics, Dr. Kalaignar M. Karunanidhi Government Institute for Postgraduate Studies and Research, Karaikal, UT of Puducherry 609605, India.

<sup>e</sup> System Design Laboratory, Information and Communication Technology, Dhirubhai Ambani Institute of Information and Communication Technology, Gujarat 382007, India.

<sup>f</sup> Department of Physics, RPS Degree College, Balana, Mahendergarh, Haryana 123029, India.

Supplementary Information available: [details of any supplementary information available should be included here]. See DOI: 10.1039/x0xx00000x
